# Supplementary material
Source: publisher site journal article supplement (https://www.dovepress.com/article/588634)
Supplement: Supplementary file 1 [file 588634%20Revised%20Supplementary%20Material.pdf]

**Table****Table S1. Reagent**

| <b>Reagent name</b>                          | <b>Reagent supplier</b>   | <b>Item Number</b> |
|----------------------------------------------|---------------------------|--------------------|
| $\alpha$ -SMA antibody                       | proteintech               | 55135-1-AP         |
| CTR1 antibody (Usage for Immunofluorescence) | Bioss                     | bs-10773R          |
| CTR1 antibody (Usage for western blot)       | Cell Signaling Technology | 13086S             |
| ATOX1 antibody                               | proteintech               | 22641-1-AP         |
| LOX antibody                                 | proteintech               | 17958-1-AP         |
| Collagen I antibody                          | proteintech               | 14695-1-AP         |
| Collagen III antibody                        | proteintech               | 22734-1-AP         |
| COX17 antibody                               | proteintech               | 11464-1-AP         |
| CCS antibody                                 | proteintech               | 68341-1-AP         |
| ATP7A antibody                               | ABclonal                  | A8399              |
| ATP7B antibody                               | proteintech               | 19786-1-AP         |
| GAPDH antibody                               | Diagbio                   | db11729            |
| $\beta$ -actin antibody                      | ABclonal                  | AC026              |
| ECL                                          | Sparkjade                 | ED0016-C           |
| RIPA lysate                                  | Sparkjade                 | EA0002             |
| BCA protein assay kit                        | EpiZyme                   | ZJ102              |
| 10% SDS-PAGE gels                            | EpiZyme                   | PG212              |
| 10% TRICINE gels                             | EpiZyme                   | PG310              |
| Transfer buffer                              | Servicebio                | G2154              |
| Blocking buffer                              | EpiZyme                   | PS108P             |
| Tissue copper content detection kit          | Soleibao                  | BC5565             |
| Serum copper content detection kit           | Soleibao                  | BC5645             |
| Cell copper content detection kit            | Soleibao                  | BC5755             |
| Rhodamine 6G hydrazide                       | MedChemExpress            | HY-D1599           |
| BNP ELISA kits                               | JONLNBIO                  | JL11641            |
| NT-ProBNP ELISA kits                         | JONLNBIO                  | JL12884            |
| Mouse LOX ELISA kits                         | Bioswamp                  | mu31945            |
| Mouse DPD ELISA kits                         | Jonln                     | JL53125            |
| Human LOX ELISA kits                         | JONLNBIO                  | JL14911            |
| Human DPD ELISA kits                         | Bioswamp                  | HM11023            |
| LOX assay kit                                | AAT Bioquest              | 15255              |
| Hydroxyproline assay kit                     | Nanjing JianCheng         | A030-2-1           |
| RT SuperMix                                  | Vazyme                    | R323               |
| Universal SYBR qPCR Master                   | Vazyme                    | Q712               |

---

|                                                  |           |         |
|--------------------------------------------------|-----------|---------|
| Mix                                              |           |         |
| Human cardiac fibroblasts                        | Priscilla | CP-H078 |
| Human Cardiac Fibroblast Cell<br>Complete Medium | Priscilla | CM-H078 |

---

**Table S2. The primer sequences for qPCR**

| <b>Name</b> | <b>Species</b> | <b>Forward primer (5'-3')</b> | <b>Reverse primer (5'-3')</b> |
|-------------|----------------|-------------------------------|-------------------------------|
| CTR1        | Human          | CTCACCATCACCCAACCACT          | AAACACTGCCACAAAAGCTCC         |
| ATOX1       | Human          | GACATTGACCTGCCCAACAAG         | CTTCAGGGTTGCAAGCAGAGT         |
| LOX         | Human          | AGATTTCTTACCCAGCCGACC         | GCAAATCGCCTGTGGTAGC           |

**Table S3. Binding energy of AS-IV to CTR1**

| mode | Affinity<br>(kcal/mol) | rmsd l.b | rmsd u.b |
|------|------------------------|----------|----------|
| 1    | -7.2                   | 0        | 0        |
| 2    | -7.2                   | 21.648   | 25.182   |
| 3    | -7.1                   | 10.268   | 15.338   |
| 4    | -7.1                   | 36.857   | 42.377   |
| 5    | -6.9                   | 49.756   | 56.879   |
| 6    | -6.9                   | 30.586   | 33.436   |
| 7    | -6.8                   | 7.193    | 13.027   |
| 8    | -6.8                   | 45.523   | 51.086   |
| 9    | -6.8                   | 45.326   | 49.755   |

**Table S4. Binding energy of Tan II A to CTR1**

| mode | Affinity<br>(kcal/mol) | rmsd l.b | rmsd u.b |
|------|------------------------|----------|----------|
| 1    | -8.1                   | 0        | 0        |
| 2    | -7.8                   | 43.869   | 47.165   |
| 3    | -7.7                   | 14.96    | 17.43    |
| 4    | -7.7                   | 23.83    | 24.921   |
| 5    | -7.4                   | 15.035   | 18.84    |
| 6    | -7.4                   | 24.776   | 26.165   |
| 7    | -7.3                   | 24.298   | 27.585   |
| 8    | -7.1                   | 15.17    | 16.734   |
| 9    | -7.1                   | 35.553   | 37.808   |

**Table S5. Binding energy of Cimetidine to CTR1**

| mode | Affinity<br>(kcal/mol) | rmsd l.b | rmsd u.b |
|------|------------------------|----------|----------|
| 1    | -4.8                   | 0        | 0        |
| 2    | -4.7                   | 1.63     | 2.396    |
| 3    | -4.6                   | 46.793   | 47.788   |
| 4    | -4.6                   | 58.822   | 60.441   |
| 5    | -4.5                   | 58.195   | 59.713   |
| 6    | -4.4                   | 4.448    | 5.634    |
| 7    | -4.3                   | 26.066   | 28.428   |
| 8    | -4.3                   | 43.039   | 44.479   |
| 9    | -4.3                   | 34.115   | 35.638   |
